# Supplementary material
Source: publisher figshare collection journal article supplement (https://geolsoc.figshare.com/articles/dataset/_/3453779)

**Electronic appendix 2:** Comparison of H<sub>2</sub>O data between the transmission and reflectance FTIR.

**Data from Rotorua and Ohakuri Volcanic Centres, TVZ**

| Sample             | H2O (wt%)<br>transmission FTIR<br>(n=64) | H2O (wt%)<br>reflectance FTIR<br>(n=76) | Sample    | Type       |
|--------------------|------------------------------------------|-----------------------------------------|-----------|------------|
| Oh48-FTIR1-MI1-a   | 4.21                                     | 4.28                                    | FB11-Oh49 | Oh Airfall |
| Oh48-FTIR1-MI1-b   | 4.01                                     | 4.23                                    | FB11-Oh49 | Oh Airfall |
| Oh48-FTIR1-MI1-IRc | 3.89                                     | 4.64                                    | FB11-Oh50 | Oh Airfall |
| Oh48-FTIR1-MI2-a   | 3.58                                     | 4.40                                    | FB11-Oh50 | Oh Airfall |
| Oh48-FTIR1-MI2-b   | 3.35                                     | 3.26                                    | FB11-Oh50 | Oh Airfall |
| Oh48-FTIR1-MI2-IRc | 3.64                                     | 3.34                                    | FB11-Oh50 | Oh Airfall |
| Oh49-FTIR1-MI1-a   | 5.91                                     | 4.17                                    | FB11-Oh51 | Oh Airfall |
| Oh49-FTIR1-MI1-b   | 6.35                                     | 4.45                                    | FB11-Oh51 | Oh Airfall |
| Oh49-FTIR1-MI1-IRc | 6.15                                     | 4.40                                    | FB11-Oh52 | Oh Airfall |
| Oh49-FTIR1-MI1-a   | 4.97                                     | 4.23                                    | FB11-Oh52 | Oh Airfall |
| Oh49-FTIR1-MI1-b   | 5.97                                     | 4.23                                    | FB11-Oh52 | Oh Airfall |
| Oh49-FTIR1-MI1-IRc | 5.92                                     | 4.29                                    | FB11-Oh52 | Oh Airfall |
| Oh49-FTIR2-MI1-a   | 4.25                                     | 4.11                                    | FB11-Oh2  | Type 2     |
| Oh49-FTIR2-MI1-b   | 4.07                                     | 3.99                                    | FB11-Oh2  | Type 2     |
| Oh49-FTIR2-MI1-c   | 4.33                                     | 4.21                                    | FB11-Oh2  | Type 2     |
| Oh49-FTIR3-MI1-a   | 5.20                                     | 3.99                                    | FB11-Oh2  | Type 2     |
| Oh49-FTIR3-MI1-b   | 4.95                                     | 3.99                                    | FB11-Oh2  | Type 2     |
| Oh49-FTIR3-MI1-c   | 4.89                                     | 4.07                                    | FB11-Oh2  | Type 2     |
| Oh49-FTIR3-MI1-IRd | 4.78                                     | 4.19                                    | D152b     | Type 1     |
| Oh49-FTIR3-MI2-a   | 4.44                                     | 3.99                                    | D152b     | Type 1     |
| Oh49-FTIR3-MI2-b   | 5.35                                     | 4.06                                    | D152b     | Type 1     |
| Oh49-FTIR3-MI2-IRc | 4.55                                     | 4.23                                    | D152b     | Type 1     |
| Oh2-FTIR11-MI1-a   | 3.45                                     | 4.23                                    | D152b     | Type 1     |
| Oh2-FTIR11-MI1-b   | 3.50                                     | 3.88                                    | D152b     | Type 1     |
| Oh2-FTIR11-MI1-IRc | 3.44                                     | 4.05                                    | D152b     | Type 1     |
| Oh2-FTIR12-MI1-a   | 5.11                                     | 3.61                                    | D152b     | Type 1     |
| Oh2-FTIR12-MI1-b   | 4.61                                     | 4.24                                    | D152b     | Type 1     |
| Oh2-FTIR12-MI1-IRc | 4.42                                     | 4.10                                    | D152b     | Type 1     |
| Oh2-FTIR12-MI2-a   | 4.57                                     | 4.03                                    | D152b     | Type 1     |
| Oh2-FTIR12-MI2-b   | 4.60                                     | 4.28                                    | D152b     | Type 1     |
| Oh2-FTIR12-MI2-IRc | 4.41                                     | 4.36                                    | D152b     | Type 1     |
| D152b-FTIR11-MI1-b | 3.98                                     | 4.27                                    | D152b     | Type 1     |
| D152b-FTIR11-MI1-c | 3.66                                     | 4.31                                    | D152b     | Type 1     |
| Oh4-FTIR11-MI1-b   | 4.02                                     | 4.45                                    | FB11-Oh1  | Type 1     |
| Oh4-FTIR11-MI1-IRc | 3.99                                     | 4.24                                    | FB11-Oh1  | Type 1     |
| Oh5-FTIR11-MI1-a   | 4.00                                     | 4.38                                    | FB11-Oh1  | Type 1     |
| Oh5-FTIR11-MI1-b   | 4.01                                     | 4.50                                    | FB11-Oh1  | Type 1     |
| Oh5-FTIR11-MI1-IRc | 4.20                                     | 4.32                                    | FB11-Oh1  | Type 1     |

## Data from Rotorua and Ohakuri Volcanic Centres, TVZ (cont.)

| Sample             | H2O (wt%)<br>transmission FTIR<br>(n=64) | H2O (wt%)<br>reflectance FTIR<br>(n=76) | Sample   | Type   |
|--------------------|------------------------------------------|-----------------------------------------|----------|--------|
| Ma21-FTIR1-MI1-a   | 4.36                                     | 4.38                                    | FB11-Oh1 | Type 1 |
| Ma21-FTIR1-MI1-b   | 4.29                                     | 3.61                                    | FB11-Oh1 | Type 1 |
| Ma21-FTIR1-MI1-IRc | 4.23                                     | 4.08                                    | FB11-Oh4 | Type 1 |
| Ma21-FTIR1-MI2-a   | 3.66                                     | 4.48                                    | FB11-Oh4 | Type 1 |
| Ma21-FTIR1-MI2-b   | 3.72                                     | 3.97                                    | FB11-Oh3 | Type 2 |
| Ma21-FTIR1-MI2-IRc | 3.86                                     | 4.06                                    | FB11-Oh3 | Type 2 |
| Ma55-FTIR2-MI1-a   | 4.21                                     | 3.69                                    | FB11-Oh3 | Type 2 |
| Ma55-FTIR2-MI1-b   | 4.16                                     | 3.44                                    | FB11-Oh3 | Type 2 |
| Ma55-FTIR2-MI1-IRc | 4.45                                     | 4.00                                    | D3       | Type 3 |
| Ma55-FTIR2-MI2-a   | 3.96                                     | 4.15                                    | D3       | Type 3 |
| Ma55-FTIR2-MI2-b   | 4.03                                     | 3.95                                    | D3       | Type 3 |
| Ma55-FTIR2-MI2-c   | 3.11                                     | 3.97                                    | D3       | Type 3 |
| Ma55-FTIR2-MI2-IRd | 3.60                                     | 3.91                                    | Ma21     | Type 1 |
| Ma57-FTIR1-MI1-a   | 4.06                                     | 4.46                                    | Ma21     | Type 1 |
| Ma57-FTIR1-MI1-IRc | 4.27                                     | 3.72                                    | Ma21     | Type 1 |
| Ma22-FTIR1-MI1-a   | 3.24                                     | 3.83                                    | Ma21     | Type 1 |
| Ma22-FTIR1-MI1-b   | 3.18                                     | 3.68                                    | Ma21     | Type 1 |
| Ma22-FTIR1-MI1-c   | 3.41                                     | 4.46                                    | Ma55     | Type 1 |
| Ma23-FTIR1-MI1-a   | 3.87                                     | 4.07                                    | Ma55     | Type 1 |
| Ma23-FTIR1-MI1-b   | 3.90                                     | 3.61                                    | Ma55     | Type 1 |
| Ma23-FTIR1-MI1-c   | 3.86                                     | 4.17                                    | Ma55     | Type 1 |
| Ma23-FTIR1-MI2-a   | 3.98                                     | 4.31                                    | Ma57     | Type 1 |
| Ma23-FTIR1-MI2-b   | 3.37                                     | 4.32                                    | Ma57     | Type 1 |
| Ma23-FTIR1-MI2-IRc | 3.59                                     | 4.02                                    | Ma57     | Type 1 |
| Ma23-FTIR1-MI3-a   | 3.38                                     | 3.71                                    | Ma57     | Type 1 |
| Ma23-FTIR1-MI3-b   | 3.34                                     | 4.44                                    | Ma57     | Type 1 |
|                    |                                          | 4.28                                    | Ma57     | Type 1 |
|                    |                                          | 4.42                                    | Ma56     | Type 1 |
|                    |                                          | 4.45                                    | Ma56     | Type 1 |
|                    |                                          | 4.77                                    | Ma26     | Type 1 |
|                    |                                          | 4.47                                    | Ma26     | Type 1 |
|                    |                                          | 3.73                                    | Ma55     | Type 1 |
|                    |                                          | 4.06                                    | Ma56     | Type 1 |
|                    |                                          | 4.04                                    | Ma56     | Type 1 |
|                    |                                          | 4.38                                    | Ma22     | Type 2 |
|                    |                                          | 4.34                                    | Ma22     | Type 2 |
|                    |                                          | 3.96                                    | Ma25     | Type 2 |
|                    |                                          | 3.80                                    | Ma25     | Type 2 |

|                 | Summary range                            |                                         |
|-----------------|------------------------------------------|-----------------------------------------|
|                 | H2O (wt%)<br>transmission<br>FTIR (n=64) | H2O (wt%)<br>reflectance FTIR<br>(n=76) |
| Min             | 3.11                                     | 3.26                                    |
| 25th percentile | 3.660528716                              | 3.98278815                              |
| Median          | 4.05                                     | 4.17                                    |
| 75th percentile | 4.475794389                              | 4.327045854                             |
| Max             | 6.35                                     | 4.77                                    |

## Rotorua-Ohakuri Volcanic Centres, TVZ

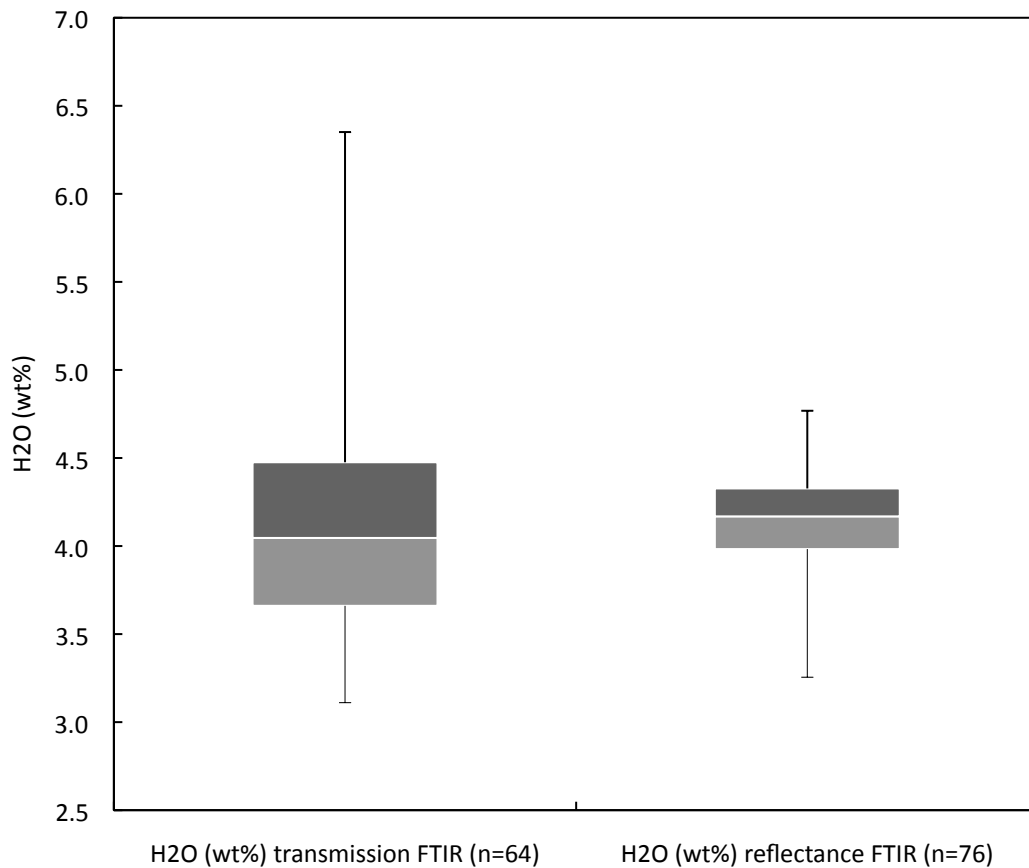

Supplement: Supplementary file 1 [file 1]
